# Supplementary material for: Harnessing technology and molecular analysis to understand the development of cardiovascular diseases in Asia: a prospective cohort study (SingHEART)
Source: Springer Nature journal article supplement (doi:10.1186/s12872-019-1248-3), 2019-11-21
Supplement: MOESM1 [file 17415484]

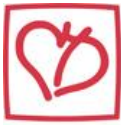

## Inclusion & Exclusion Criteria Checklist

**Study Title: SingHEART – Effects of physical activity, ambulatory blood pressure and calcium score on cardiovascular health in normal people (2015/2601)**

**Sub-study of: Molecular and Imaging Studies of Cardiovascular Health and Disease (IRB 2013/605/C)**

Date of screening : \_\_\_\_\_

Subject initial : \_\_\_\_\_

Subject ID : \_\_\_\_\_

Affix Subject Label

| No. | Inclusion Criteria                                                                                           | Yes | No |
|-----|--------------------------------------------------------------------------------------------------------------|-----|----|
| 1.  | Aged 21-69 years old                                                                                         |     |    |
| No. | Exclusion Criteria                                                                                           | Yes | No |
| 1.  | Previous myocardial infarction (MI), inclusive of ST-elevation MI (STEMI) and non-ST-elevation MI (NSTEMI)   |     |    |
| 2.  | Known coronary artery disease – prior coronary revascularization                                             |     |    |
| 3.  | Known documented peripheral arterial disease                                                                 |     |    |
| 4.  | Previous stroke<br>a. Stroke is defined as new focal neurological deficit persisting more than 24hours       |     |    |
| 5.  | More than ongoing use of $\geq 2$ anti-hypertensive agents                                                   |     |    |
| 6.  | Prior history of cancer (excludes pre-cancerous lesions)                                                     |     |    |
| 7.  | Expected life expectancy less than 1 year                                                                    |     |    |
| 8.  | Known definite diabetes mellitus or on treatment for diabetes mellitus                                       |     |    |
| 9.  | Known autoimmune disease or genetic disease                                                                  |     |    |
| 10. | Known endocrine disease on treatment                                                                         |     |    |
| 11. | Psychiatric illness                                                                                          |     |    |
| 12. | Asthma or chronic lung disease requiring long term medications or oxygen                                     |     |    |
| 13. | Chronic infective disease, including tuberculosis, hepatitis B and C; and HIV                                |     |    |
| 14. | Inability to comply with study protocol                                                                      |     |    |
| 15. | Any other acute or chronic medical or physical condition deemed by the investigator to affect study outcomes |     |    |

**Subject is unable to be recruited into study if 'yes' was checked for any of exclusion criteria.**

Tick if screen failure

Other reason(s) for screen failure : \_\_\_\_\_

Name of Person Obtaining Consent : \_\_\_\_\_

Signature of Person Obtaining Consent : \_\_\_\_\_

Date : \_\_\_\_\_
