# Supplementary material for: Harnessing technology and molecular analysis to understand the development of cardiovascular diseases in Asia: a prospective cohort study (SingHEART)
Source: Springer Nature journal article supplement (doi:10.1186/s12872-019-1248-3), 2019-11-21
Supplement: MOESM2 [file 17415484]

## SINGHEART Patient Questionnaire

### DEMOGRAPHICS

1) Race?

Chinese  Malay  Indian  Others: \_\_\_\_\_

2) Country of birth?

Singapore  Others: \_\_\_\_\_

3) Marital status?

Married  Single  Widowed  Separated/divorced

4) Religion?

Free thinker  Christian/Catholic  Buddhist  Taoist  Islam  Hindu  
 Judaism  Others: \_\_\_\_\_

5) Highest education level?

No formal education  Primary  Secondary/High school  Polytechnic  
 ITE  A-Level  Degree/University or higher

6) Type of housing currently living in

|                                           |                                                                    |
|-------------------------------------------|--------------------------------------------------------------------|
| <input type="checkbox"/> 1 or 2 Room HDB: | <input type="checkbox"/> Owned or <input type="checkbox"/> Rented? |
| <input type="checkbox"/> 3 Room HDB:      | <input type="checkbox"/> Owned or <input type="checkbox"/> Rented? |
| <input type="checkbox"/> 4 Room HDB:      | <input type="checkbox"/> Owned or <input type="checkbox"/> Rented? |
| <input type="checkbox"/> 5 Room HDB       | <input type="checkbox"/> Owned or <input type="checkbox"/> Rented? |
| <input type="checkbox"/> HUDC:            | <input type="checkbox"/> Owned or <input type="checkbox"/> Rented? |
| <input type="checkbox"/> Condominium:     | <input type="checkbox"/> Owned or <input type="checkbox"/> Rented? |
| <input type="checkbox"/> Landed property: | <input type="checkbox"/> Owned or <input type="checkbox"/> Rented? |
| <input type="checkbox"/> Others: _____ :  | <input type="checkbox"/> Owned or <input type="checkbox"/> Rented? |

7) Occupation?

Unemployed/retired  Blue collared (involving manual labour)  
 White collared (office work, professionals)  Pink collared (service industry)

8) Monthly income?

- <\$1000/Not working    \$1000-1999    \$2000-2999    \$3000-4999  
 \$5000-6999    \$7000-8999    \$9000 and more

9) How many siblings?

\_\_\_ brother(s) \_\_\_ sister(s)

10 How many children?

\_\_\_ son(s) \_\_\_ daughter(s)

### **MEDICAL HISTORY**

11) Do you have a family history (siblings OR father/mother OR children) of: (tick all that apply)

- |                                                                |            |                 |
|----------------------------------------------------------------|------------|-----------------|
| <input type="checkbox"/> Diabetes                              | Who? _____ | What age? _____ |
| <input type="checkbox"/> Hypertension (high blood pressure)    | Who? _____ | What age? _____ |
| <input type="checkbox"/> Hyperlipidemia (high cholesterol)     | Who? _____ | What age? _____ |
| <input type="checkbox"/> Heart attack/heart blockage           | Who? _____ | What age? _____ |
| <input type="checkbox"/> Heart failure                         | Who? _____ | What age? _____ |
| <input type="checkbox"/> Other heart disease: (specify: _____) | Who? _____ | What age? _____ |
| <input type="checkbox"/> Sudden unexpected death               | Who? _____ | What age? _____ |

12) Do you have any of the following medical conditions (tick all that apply)

- |                                                             |                        |
|-------------------------------------------------------------|------------------------|
| <input type="checkbox"/> Coronary artery disease            | Duration _____ (years) |
| <input type="checkbox"/> Heart attack                       | Duration _____ (years) |
| <input type="checkbox"/> Previous stenting                  | Duration _____ (years) |
| <input type="checkbox"/> Previous coronary artery bypass    | Duration _____ (years) |
| <input type="checkbox"/> Heart failure                      | Duration _____ (years) |
| <input type="checkbox"/> Previous stroke                    | Duration _____ (years) |
| <input type="checkbox"/> Diabetes mellitus                  | Duration _____ (years) |
| <input type="checkbox"/> Hypertension (high blood pressure) | Duration _____ (years) |
| <input type="checkbox"/> Hyperlipidemia (high cholesterol)  | Duration _____ (years) |
| <input type="checkbox"/> Cancer, please specify: _____      | Duration _____ (years) |

- |                                                        |                        |
|--------------------------------------------------------|------------------------|
| <input type="checkbox"/> Asthma                        | Duration _____ (years) |
| <input type="checkbox"/> Kidney failure on dialysis    | Duration _____ (years) |
| <input type="checkbox"/> Chronic lung disease          | Duration _____ (years) |
| <input type="checkbox"/> Hepatitis B/C                 | Duration _____ (years) |
| <input type="checkbox"/> Others, please specify: _____ | Duration _____ (years) |

### SMOKING

13) Do you currently smoke?

- Yes (\_\_\_\_ pack/day x \_\_\_\_ years)
- Previously (\_\_\_\_ pack/day x \_\_\_\_ years) but stopped for  <6m  ≥6m
- No

14) On average, how many of the following do you smoke a day? (tick all that apply)

- Cigarettes \_\_\_\_/day
- Ang hoon \_\_\_\_/day
- Pipes \_\_\_\_/day
- Cigars \_\_\_\_/day

15) What is highest number of cigarettes smoked a day?

\_\_\_\_\_

16) Are you currently exposed to cigarette smoke at home?

- Never  Sometimes  Most of the time  All the time

17) Are you currently exposed to cigarette smoke at work?

- Never  Sometimes  Most of the time  All the time

### ALCOHOL

18) Have you consumed alcohol within the past 3 months?

- Yes (\_\_\_\_ units per week)
- No

(1 unit= half pint of beer, small glass of wine or shot of spirit/hard liquor)

19) How often in the last year did you drink the following alcoholic beverages?

(tick all that apply)

- Beer can \_\_\_\_\_ per week
- Beer bottle \_\_\_\_\_ per week
- Red wine \_\_\_\_\_ glasses per week
- White wine \_\_\_\_\_ glasses per week
- Sparkling wine \_\_\_\_\_ glasses per week
- Hard liquor \_\_\_\_\_ glasses per week

### TRADITIONAL/COMPLEMENTARY MEDICINE

20) Do you use Traditional medicines/complementary medicines?

- Yes
- No

21) On average, how many times **a month** do you use traditional/complimentary medicines?

\_\_\_\_ times

22) What type of traditional/complementary medicines do you use? (tick all that apply)

- Traditional Chinese medicine
- Acupuncture
- Jamu/Traditional Malay medicine
- Traditional Indian medicine
- Relaxation therapies: yoga, meditation
- Herbal remedies: garlic, ginger, ginkgo biloba etc
- Vitamins
- Massages
- Chiropractic
- Tai chi or chi gong
- Magnetic therapy
- Others: \_\_\_\_\_

### EXERCISE

23) How often do you exercise a week?

- Never/hardly (ie. not even once a week on average)
- \_\_\_\_ times for \_\_\_\_ min each time

Please specify type of exercise: \_\_\_\_\_

## DIET

24) How much coffee do you drink a week?

- never or rarely                       <1 cup a week  
  $\geq 1$  cup a week but <1 daily       \_\_\_ cups a day  
(tick all that apply)                       with milk?    with sugar?

25) How much English tea do you drink a week?

- never or rarely                       <1 cup a week  
  $\geq 1$  cup a week but <1 daily       \_\_\_ cups a day  
(tick all that apply)                       with milk?    with sugar?

26) How much Chinese tea do you drink a week?

- never or rarely                       <1 cup a week  
  $\geq 1$  cup a week but <1 daily       \_\_\_ cups a day  
(tick all that apply)                       with milk?    with sugar?

27) How much Green tea do you drink a week?

- never or rarely                       <1 cup a week  
  $\geq 1$  cup a week but <1 daily       \_\_\_ cups a day  
(tick all that apply)                       with milk?    with sugar?

28) How many servings of vegetables do you take a day?

\_\_\_\_\_ servings

(eg. 1 serving is  $\frac{3}{4}$  mug cooked leafy or non-leafy vegetables (100g)/  $\frac{1}{4}$  round plate of cooked vegetables/150g raw leafy vegetables/100g raw non-leafy vegetables)

29) How many servings of fruits do you take a day?

\_\_\_\_\_ servings

(one serving is 1 small apple, orange, pear or mango/1 wedge of pineapple, papaya or watermelon/10 grapes or longans (50g)/1 medium banana)

**PERCEPTIONS**

30) How active do you think your lifestyle is? (Circle your answer)

|                                                                                                                         |   |   |   |   |   |   |   |   |    |
|-------------------------------------------------------------------------------------------------------------------------|---|---|---|---|---|---|---|---|----|
| 1                                                                                                                       | 2 | 3 | 4 | 5 | 6 | 7 | 8 | 9 | 10 |
| <b>Not active</b> 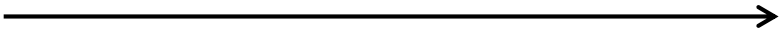 <b>Very active</b> |   |   |   |   |   |   |   |   |    |

31) In general, how stressed do you feel? (Circle your answer)

|                                                                                                                             |   |   |   |   |   |   |   |   |    |
|-----------------------------------------------------------------------------------------------------------------------------|---|---|---|---|---|---|---|---|----|
| 1                                                                                                                           | 2 | 3 | 4 | 5 | 6 | 7 | 8 | 9 | 10 |
| <b>Not stressed</b>  <b>Very stressed</b> |   |   |   |   |   |   |   |   |    |

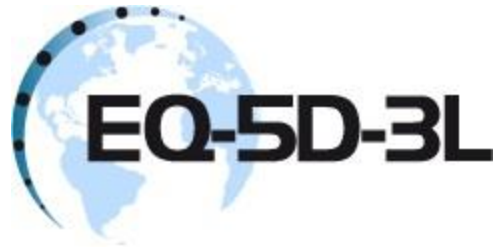

## **Health Questionnaire**

**English version for Singapore**

By placing a tick in one box in each group below, please indicate which statements best describe your own health state today.

**Mobility**

- I have no problems in walking about
- I have some problems in walking about
- I am confined to bed

**Self-Care**

- I have no problems with self-care
- I have some problems washing or dressing myself
- I am unable to wash or dress myself

**Usual Activities** (e.g. work, study, housework, family or leisure activities)

- I have no problems with performing my usual activities
- I have some problems with performing my usual activities
- I am unable to perform my usual activities

**Pain / Discomfort**

- I have no pain or discomfort
- I have moderate pain or discomfort
- I have extreme pain or discomfort

**Anxiety / Depression**

- I am not anxious or depressed
- I am moderately anxious or depressed
- I am extremely anxious or depressed



To help people say how good or bad a health state is, we have drawn a scale (rather like a thermometer) on which the best state you can imagine is marked 100 and the worst state you can imagine is marked 0.

We would like you to indicate on this scale how good or bad your own health is today, in your opinion. Please do this by drawing a line from the **BLACK BOX** below to whichever point on the scale indicates how good or bad your health state is today.

**Your own health state today**

Best imaginable health state

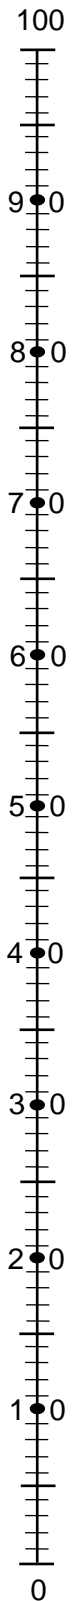

Worst imaginable health state

Subject's Initials \_\_\_\_\_ ID# \_\_\_\_\_ Date \_\_\_\_\_ Time \_\_\_\_\_ AM  
PM

### PITTSBURGH SLEEP QUALITY INDEX

#### **INSTRUCTIONS:**

The following questions relate to your usual sleep habits during the past month only. Your answers should indicate the most accurate reply for the majority of days and nights in the past month. Please answer all questions.

1. During the past month, what time have you usually gone to bed at night?

BED TIME \_\_\_\_\_

2. During the past month, how long (in minutes) has it usually taken you to fall asleep each night?

NUMBER OF MINUTES \_\_\_\_\_

3. During the past month, what time have you usually gotten up in the morning?

GETTING UP TIME \_\_\_\_\_

4. During the past month, how many hours of actual sleep did you get at night? (This may be different than the number of hours you spent in bed.)

HOURS OF SLEEP PER NIGHT \_\_\_\_\_

***For each of the remaining questions, check the one best response. Please answer all questions.***

5. During the past month, how often have you had trouble sleeping because you . . .

- a) Cannot get to sleep within 30 minutes

|                                    |                                |                               |                                     |
|------------------------------------|--------------------------------|-------------------------------|-------------------------------------|
| Not during the<br>past month _____ | Less than<br>once a week _____ | Once or twice<br>a week _____ | Three or more<br>times a week _____ |
|------------------------------------|--------------------------------|-------------------------------|-------------------------------------|

- b) Wake up in the middle of the night or early morning

|                                    |                                |                               |                                     |
|------------------------------------|--------------------------------|-------------------------------|-------------------------------------|
| Not during the<br>past month _____ | Less than<br>once a week _____ | Once or twice<br>a week _____ | Three or more<br>times a week _____ |
|------------------------------------|--------------------------------|-------------------------------|-------------------------------------|

- c) Have to get up to use the bathroom

|                                    |                                |                               |                                     |
|------------------------------------|--------------------------------|-------------------------------|-------------------------------------|
| Not during the<br>past month _____ | Less than<br>once a week _____ | Once or twice<br>a week _____ | Three or more<br>times a week _____ |
|------------------------------------|--------------------------------|-------------------------------|-------------------------------------|

d) Cannot breathe comfortably

|                                   |                               |                              |                                    |
|-----------------------------------|-------------------------------|------------------------------|------------------------------------|
| Not during the<br>past month_____ | Less than<br>once a week_____ | Once or twice<br>a week_____ | Three or more<br>times a week_____ |
|-----------------------------------|-------------------------------|------------------------------|------------------------------------|

e) Cough or snore loudly

|                                   |                               |                              |                                    |
|-----------------------------------|-------------------------------|------------------------------|------------------------------------|
| Not during the<br>past month_____ | Less than<br>once a week_____ | Once or twice<br>a week_____ | Three or more<br>times a week_____ |
|-----------------------------------|-------------------------------|------------------------------|------------------------------------|

f) Feel too cold

|                                   |                               |                              |                                    |
|-----------------------------------|-------------------------------|------------------------------|------------------------------------|
| Not during the<br>past month_____ | Less than<br>once a week_____ | Once or twice<br>a week_____ | Three or more<br>times a week_____ |
|-----------------------------------|-------------------------------|------------------------------|------------------------------------|

g) Feel too hot

|                                   |                               |                              |                                    |
|-----------------------------------|-------------------------------|------------------------------|------------------------------------|
| Not during the<br>past month_____ | Less than<br>once a week_____ | Once or twice<br>a week_____ | Three or more<br>times a week_____ |
|-----------------------------------|-------------------------------|------------------------------|------------------------------------|

h) Had bad dreams

|                                   |                               |                              |                                    |
|-----------------------------------|-------------------------------|------------------------------|------------------------------------|
| Not during the<br>past month_____ | Less than<br>once a week_____ | Once or twice<br>a week_____ | Three or more<br>times a week_____ |
|-----------------------------------|-------------------------------|------------------------------|------------------------------------|

i) Have pain

|                                   |                               |                              |                                    |
|-----------------------------------|-------------------------------|------------------------------|------------------------------------|
| Not during the<br>past month_____ | Less than<br>once a week_____ | Once or twice<br>a week_____ | Three or more<br>times a week_____ |
|-----------------------------------|-------------------------------|------------------------------|------------------------------------|

j) Other reason(s), please describe \_\_\_\_\_

---

How often during the past month have you had trouble sleeping because of this?

|                                   |                               |                              |                                    |
|-----------------------------------|-------------------------------|------------------------------|------------------------------------|
| Not during the<br>past month_____ | Less than<br>once a week_____ | Once or twice<br>a week_____ | Three or more<br>times a week_____ |
|-----------------------------------|-------------------------------|------------------------------|------------------------------------|

6. During the past month, how would you rate your sleep quality overall?

Very good \_\_\_\_\_

Fairly good \_\_\_\_\_

Fairly bad \_\_\_\_\_

Very bad \_\_\_\_\_

7. During the past month, how often have you taken medicine to help you sleep (prescribed or "over the counter")?

|                                   |                               |                              |                                    |
|-----------------------------------|-------------------------------|------------------------------|------------------------------------|
| Not during the<br>past month_____ | Less than<br>once a week_____ | Once or twice<br>a week_____ | Three or more<br>times a week_____ |
|-----------------------------------|-------------------------------|------------------------------|------------------------------------|

8. During the past month, how often have you had trouble staying awake while driving, eating meals, or engaging in social activity?

|                                   |                               |                              |                                    |
|-----------------------------------|-------------------------------|------------------------------|------------------------------------|
| Not during the<br>past month_____ | Less than<br>once a week_____ | Once or twice<br>a week_____ | Three or more<br>times a week_____ |
|-----------------------------------|-------------------------------|------------------------------|------------------------------------|

9. During the past month, how much of a problem has it been for you to keep up enough enthusiasm to get things done?

|                            |       |
|----------------------------|-------|
| No problem at all          | _____ |
| Only a very slight problem | _____ |
| Somewhat of a problem      | _____ |
| A very big problem         | _____ |

10. Do you have a bed partner or room mate?

|                                        |       |
|----------------------------------------|-------|
| No bed partner or room mate            | _____ |
| Partner/room mate in other room        | _____ |
| Partner in same room, but not same bed | _____ |
| Partner in same bed                    | _____ |

If you have a room mate or bed partner, ask him/her how often in the past month you have had . . .

a) Loud snoring

|                                   |                               |                              |                                    |
|-----------------------------------|-------------------------------|------------------------------|------------------------------------|
| Not during the<br>past month_____ | Less than<br>once a week_____ | Once or twice<br>a week_____ | Three or more<br>times a week_____ |
|-----------------------------------|-------------------------------|------------------------------|------------------------------------|

b) Long pauses between breaths while asleep

|                                   |                               |                              |                                    |
|-----------------------------------|-------------------------------|------------------------------|------------------------------------|
| Not during the<br>past month_____ | Less than<br>once a week_____ | Once or twice<br>a week_____ | Three or more<br>times a week_____ |
|-----------------------------------|-------------------------------|------------------------------|------------------------------------|

c) Legs twitching or jerking while you sleep

|                                   |                               |                              |                                    |
|-----------------------------------|-------------------------------|------------------------------|------------------------------------|
| Not during the<br>past month_____ | Less than<br>once a week_____ | Once or twice<br>a week_____ | Three or more<br>times a week_____ |
|-----------------------------------|-------------------------------|------------------------------|------------------------------------|

d) Episodes of disorientation or confusion during sleep

|                                   |                               |                              |                                    |
|-----------------------------------|-------------------------------|------------------------------|------------------------------------|
| Not during the<br>past month_____ | Less than<br>once a week_____ | Once or twice<br>a week_____ | Three or more<br>times a week_____ |
|-----------------------------------|-------------------------------|------------------------------|------------------------------------|

e) Other restlessness while you sleep; please describe\_\_\_\_\_

---

|                                   |                               |                              |                                    |
|-----------------------------------|-------------------------------|------------------------------|------------------------------------|
| Not during the<br>past month_____ | Less than<br>once a week_____ | Once or twice<br>a week_____ | Three or more<br>times a week_____ |
|-----------------------------------|-------------------------------|------------------------------|------------------------------------|

# ***For Men Only***

## **International Index of Erectile Function (IIEF)**

Please use an X where applicable and be sure to initial and date all corrections

Score 0 if not done

Subject questionnaire Section 1

**Instructions:** These questions ask about the effects your erection problems have had on your sex life, over the past 4 weeks. Please answer the following questions as honestly and clearly as possible. In answering these questions, the following definitions apply:

*Definitions:*

- *Sexual activity includes intercourse, caressing, foreplay and masturbation*
- *Sexual intercourse is defined as vaginal penetration of the partner (you entered the partner)*
- *Sexual stimulation includes situations like foreplay with a partner, looking at erotic pictures, etc.*
- *Ejaculate is defined as the ejection of semen from the penis (or the feeling of this)*

**Mark ONLY one circle per question:**

1. Over the past 4 weeks, how often were you able to get an erection during sexual activity?

- No sexual activity
- Almost always or always
- Most times (much more than half the time)
- Sometimes (about half the time)
- A few times (much less than half the time)
- Almost never or never

2. Over the past 4 weeks, when you had erections with sexual stimulation, how often were your erections hard enough for penetration?

- No sexual stimulation
- Almost always or always
- Most times (much more than half the time)
- Sometimes (about half the time)
- A few times (much less than half the time)
- Almost never or never

Questions 3, 4 and 5 will ask about erections you may have had during sexual intercourse.

3. Over the past 4 weeks, when you attempted sexual intercourse, how often were you able to penetrate (enter) your partner?

- Did not attempt intercourse
- Almost always or always
- Most times (much more than half the time)
- Sometimes (about half the time)
- A few times (much less than half the time)
- Almost never or never

4. Over the past 4 weeks, during sexual intercourse, how often were you able to maintain your erection after you had penetrated (entered) your partner?

- Did not attempt intercourse
- Almost always or always
- Most times (much more than half the time)
- Sometimes (about half the time)
- A few times (much less than half the time)
- Almost never or never

5. Over the past 4 weeks, during sexual intercourse, how difficult was it to maintain your erection to completion of intercourse?

- Did not attempt intercourse
- Extremely difficult
- Very difficult
- Difficult
- Slightly difficult
- Not difficult

6. Over the past 4 weeks, how many times have you attempted sexual intercourse?

- No attempts
- 1-2 attempts
- 3-4 attempts
- 5-6 attempts
- 7-10 attempts
- 11 or more attempts

7. Over the past 4 weeks, when you attempted sexual intercourse how often was it satisfactory for you?

- Did not attempt intercourse
- Almost always or always
- Most times (much more than half the time)
- Sometimes (about half the time)
- A few times (much less than half the time)
- Almost never or never

8. Over the past 4 weeks, how much have you enjoyed sexual intercourse?

- No intercourse
- Very highly enjoyable
- Highly enjoyable
- Fairly enjoyable
- Not very enjoyable
- Not enjoyable

9. Over the past 4 weeks, when you had sexual stimulation or intercourse how often did you ejaculate?

- Did not attempt intercourse
- Almost always or always
- Most times (more than half the time)
- Sometimes (about half the time)
- A few times (much less than half the time)
- Almost never or never

10. Over the past 4 weeks, when you had sexual stimulation or intercourse how often did you have the feeling of orgasm or climax (with or without ejaculation)?

- No sexual stimulation or intercourse
- Almost always or always
- Most times (much more than half the time)
- Sometimes (about half the time)
- A few times (much less than half the time)
- Almost never or never

Questions 11 and 12 ask about sexual desire. Let's define sexual desire as a feeling that may include wanting to have a sexual experience (for example, masturbation or intercourse), thinking about having sex or feeling frustrated due to a lack of sex.

11. Over the past 4 weeks, how often have you felt sexual desire?

- Almost always or always
- Most times (much more than half the time)
- Sometimes (about half the time)
- A few times (much less than half the time)
- Almost never or never

12. Over the past 4 weeks, how would you rate your level of sexual desire?

- Very high
- High
- Moderate
- Low
- Very low or none at all



13. Over the past 4 weeks, how satisfied have you been with your overall sex life?

- Very satisfied
- Moderately satisfied
- About equally satisfied and dissatisfied
- Moderately dissatisfied
- Very dissatisfied

14. Over the past 4 weeks, how satisfied have you been with your sexual relationship with your partner?

- Very satisfied
- Moderately satisfied
- About equally satisfied and dissatisfied
- Moderately dissatisfied
- Very dissatisfied

15. Over the past 4 weeks, how do you rate your confidence that you can get and keep your **erection**?

- Very high
- High
- Moderate
- Low
- Very low
